# Supplementary material for: A Hierarchical Cascade of Second Messengers Regulates Pseudomonas aeruginosa Surface Behaviors
Source: PubMed Central journal article supplement — mBio. 2015 Jan 27;6(1):e02456-14. doi: 10.1128/mBio.02456-14 (PMC4324313; doi:10.1128/mbio.02456-14), 2015-01-27
Supplement: mbo004142139sf1.pdf [file mbo004142139sf1.pdf]

## Supporting Figures

**Fig. S1**

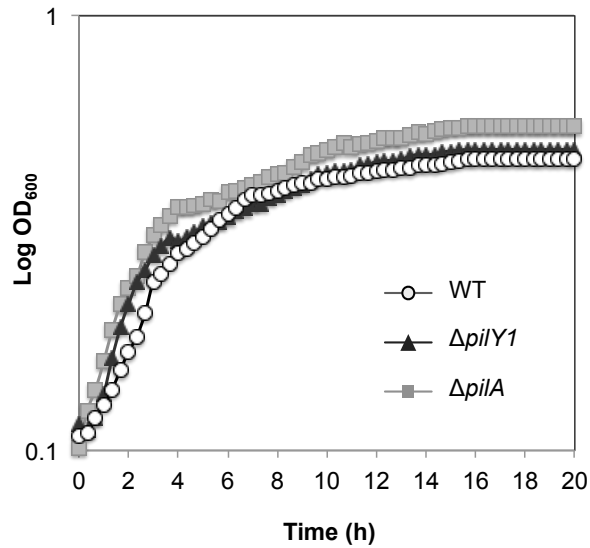

**Fig. S1. The  $\Delta pilY1$  mutant has no growth defect.** Growth curves of the WT, the  $\Delta pilY1$  and  $\Delta pilA$  mutant strains grown in M8 minimal media. Growth curves were measured by OD<sub>600</sub> using a microtiter plate reader. Six biological replicates were tested, and showed similar growth pattern. Growth curves from one representative experiment are shown.
