# Supplementary material for: A Hierarchical Cascade of Second Messengers Regulates Pseudomonas aeruginosa Surface Behaviors
Source: PubMed Central journal article supplement — mBio. 2015 Jan 27;6(1):e02456-14. doi: 10.1128/mBio.02456-14 (PMC4324313; doi:10.1128/mbio.02456-14), 2015-01-27
Supplement: mbo004142139sf2.pdf [file mbo004142139sf2.pdf]

**Fig. S2**

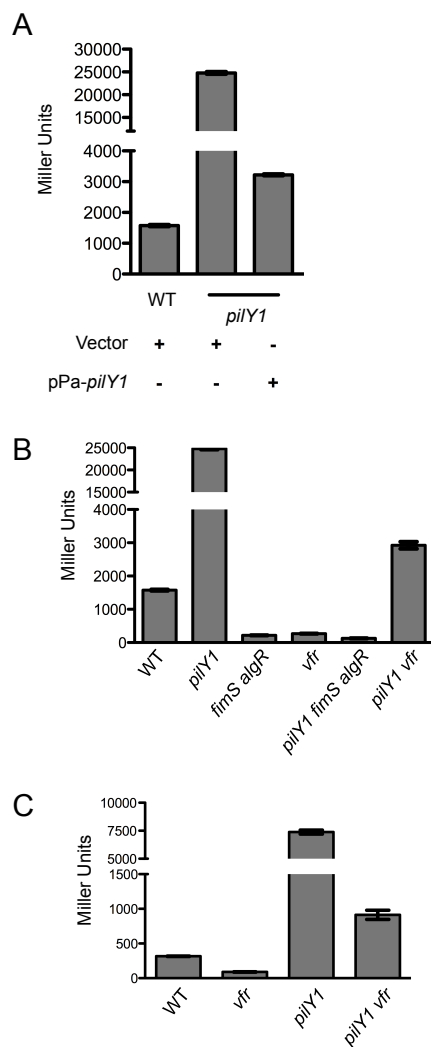

**Fig. S2.  $\beta$ -galactosidase activities of transcriptional reporter  $P_{pilY1}$ -*lacZ* and  $P_{fimS}$ -*lacZ* in *P. aeruginosa* PAK strain background. (A)  $\beta$ -galactosidase activities of transcriptional reporter  $P_{pilY1}$ -*lacZ* in the WT (*P. aeruginosa* PAK) or its derivative *pilY1* mutant strain containing either empty vector or the *pilY1* expression plasmid (pPa-*pilY1*). Cells were grown in LB broth containing 30  $\mu\text{g ml}^{-1}$  carbenicillin (Cb) and 50  $\mu\text{M}$  IPTG to mid-log growth phase ( $\text{OD}_{600} = 1.0$ ) and assayed for  $\beta$ -galactosidase activity. Values are the means  $\pm$  standard error of the mean (SEM) ( $n \geq 4$ ). All values were significantly**

different than WT when compared pair-wise, ( $P < 0.0018$ ). **(B)**  $\beta$ -galactosidase activities of transcriptional reporter  $P_{pilY1-lacZ}$  in the WT (*P. aeruginosa* PAK) or its derivative mutant strains. Cells were grown in LB broth to mid-growth phase ( $OD_{600} = 1.0$ ) and assayed for  $\beta$ -galactosidase activity. Values are the means  $\pm$  SEM ( $n = 3$ ). All values were significantly different than WT when compared pair-wise ( $P \leq 0.01$ ). **(C)**  $\beta$ -galactosidase activities of transcriptional reporter  $P_{fims-lacZ}$  in the WT (*P. aeruginosa* PAK) or its derivative mutant strains. Cells were grown in LB broth to mid-growth phase ( $OD_{600} = 1.0$ ) and assayed for  $\beta$ -galactosidase activity. Values are the means  $\pm$  standard error of the mean (SEM) ( $n = 3$ ). All values were significantly different than WT when compared pair-wise ( $P \leq 0.01$ ).
