# Supplementary material for: A Hierarchical Cascade of Second Messengers Regulates Pseudomonas aeruginosa Surface Behaviors
Source: PubMed Central journal article supplement — mBio. 2015 Jan 27;6(1):e02456-14. doi: 10.1128/mBio.02456-14 (PMC4324313; doi:10.1128/mbio.02456-14), 2015-01-27
Supplement: mbo004142139sf4.pdf [file mbo004142139sf4.pdf]

**Fig. S4**

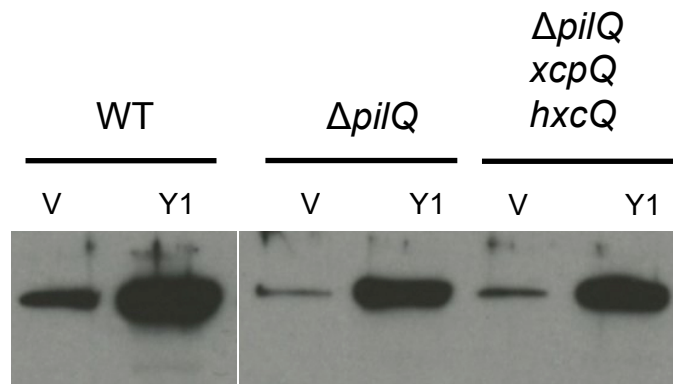

**Fig. S4. T2SS is not involved PilY1 secretion.** Assessment of PilY1 protein levels in cell surface fraction using Western blotting and anti-PilY1 antibody. Strains (indicated at the top of the panel) carrying either empty vector (V), or PilY1 expression plasmid pPilY1 (Y1) were grown on M8 minimal medium supplemented with 1% agar and 0.2% arabinose. Analysis of the PilY1 levels is described in the Supplementary Materials.
