# Supplementary material for: A Hierarchical Cascade of Second Messengers Regulates Pseudomonas aeruginosa Surface Behaviors
Source: PubMed Central journal article supplement — mBio. 2015 Jan 27;6(1):e02456-14. doi: 10.1128/mBio.02456-14 (PMC4324313; doi:10.1128/mbio.02456-14), 2015-01-27
Supplement: mbo004142139sf5.pdf [file mbo004142139sf5.pdf]

**Fig. S5**

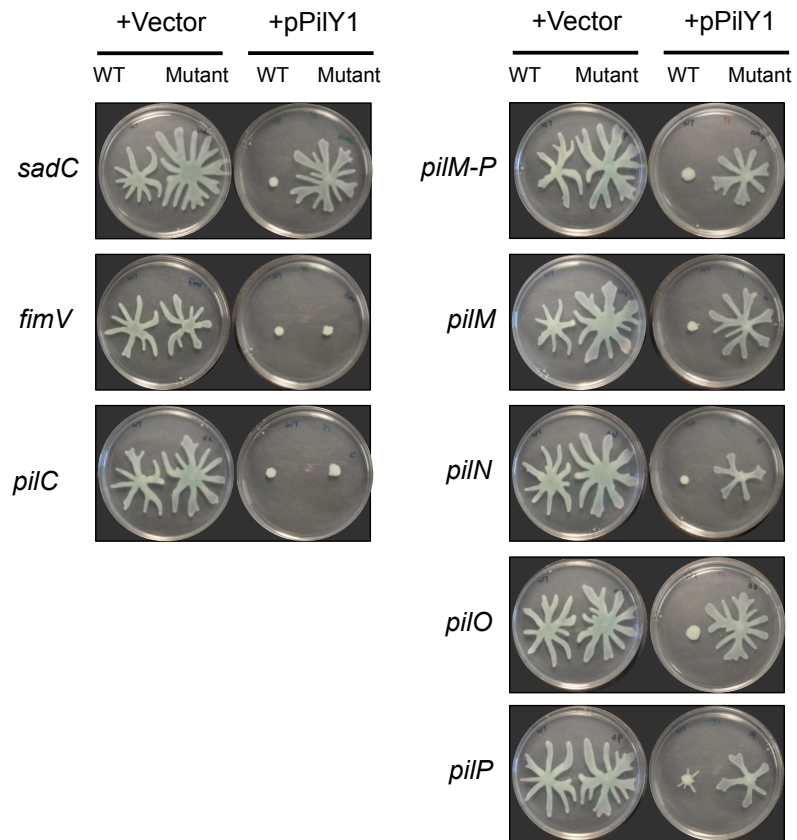

**Fig. S5. Swarms of the WT, the  $\Delta sadC$ ,  $\Delta fimV$ ,  $\Delta pilC$ ,  $\Delta pilM$ ,  $\Delta pilN$ ,  $\Delta pilO$  and  $\Delta pilP$  mutant strains carrying either empty vector or pPilY1 plasmid.** Swarming assays are performed as described in the text of the manuscript and in the Supplementary Materials. WT (left) and a mutant strain (right) are spotted on the same plate for direct comparison. All plates contained 0.2% arabinose.
