# Supplementary material for: A Hierarchical Cascade of Second Messengers Regulates Pseudomonas aeruginosa Surface Behaviors
Source: PubMed Central journal article supplement — mBio. 2015 Jan 27;6(1):e02456-14. doi: 10.1128/mBio.02456-14 (PMC4324313; doi:10.1128/mbio.02456-14), 2015-01-27
Supplement: mbo004142139st1.pdf [file mbo004142139st1.pdf]

## Supporting Tables

**Table S1.** Transposon insertion mutants with altered *P<sub>pilY1</sub>-lacZ* reporter activity.

| <b>Gene<sup>a</sup></b> | <b>Number<br/>of<br/>insertions</b> | <b>Miller unit<br/>(liquid)<sup>b</sup></b> | <b>Miller unit<br/>(surface)<sup>b</sup></b> | <b>Function/pathway</b>                                          |
|-------------------------|-------------------------------------|---------------------------------------------|----------------------------------------------|------------------------------------------------------------------|
| WT                      | N/A                                 | 72±2                                        | 147±9                                        |                                                                  |
| <i>fimS</i>             | 1                                   | 19±1                                        | 75±13                                        | Putative histidine kinase; Alginate biosynthesis                 |
| <i>algR</i>             | 1                                   | 17±2                                        | 17±5                                         | Response regulatory protein; Alginate biosynthesis,              |
| <i>vfr</i>              | 5                                   | 36±6                                        | 38±5                                         | Cyclic AMP receptor protein, transcriptional regulator           |
| <i>pilJ</i>             | 2                                   | 42±1                                        | 50±6                                         | Putative methyl-accepting chemotaxis protein                     |
| <i>pilK</i>             | 2                                   | 40±2                                        | 40±4                                         | Putative methyltransferase                                       |
| <i>chpA</i>             | 1                                   | 39±7                                        | 50±1                                         | Putative chemotaxis protein, histidine kinase                    |
| <i>fimV</i>             | 2                                   | 33±3                                        | 44±7                                         | Putative aspartate-semialdehyde dehydrogenase; TFP biosynthesis; |
| <i>pilC</i>             | 3                                   | 26±3                                        | 33±6                                         | Inner membrane platform protein; TFP biosynthesis;               |
| <i>fimU</i>             | 2                                   | 17±3                                        | 16±0                                         | Minor pilin of TFP                                               |
| <i>pilY1</i>            | 2                                   | 973±51                                      | 5726±126                                     | TFP twitching activity; swarming                                 |

---

|                                           |   |       |       | activity                                                             |
|-------------------------------------------|---|-------|-------|----------------------------------------------------------------------|
| <i>truB</i>                               | 4 | 38±18 | 52±14 | tRNA pseudouridine 55 synthase                                       |
| <i>rnpA</i>                               | 1 | 24±5  | 41±1  | Ribonuclease P protein component                                     |
| <i>rrmJ</i>                               | 1 | 29±4  | 70±1  | Cell division protein                                                |
| <i>sucD</i>                               | 1 | 41±1  | 72±7  | Succinyl-CoA synthetase alpha chain                                  |
| <i>thrH</i>                               | 1 | 44±10 | 95±15 | Homoserine kinase                                                    |
| <i>rbfA</i>                               | 1 | 50±21 | N/A   | Ribosome-binding factor A                                            |
| <i>gshA</i>                               | 1 | 38±2  | 61±2  | Glutamate--cysteine ligase                                           |
| <i>miaA</i>                               | 1 | 20±2  | 18±1  | Delta 2-isopentenylpyrophosphate transferase                         |
| <i>nuoN</i>                               | 1 | 32±2  | 69±3  | Putative methyltransferase, NADH dehydrogenase I chain N             |
| <i>pepA</i>                               | 1 | 34±0  | 55±1  | Leucine aminopeptidase                                               |
| Intergenic<br><i>PA14_28510</i><br>-28520 | 1 | 34±2  | 44±1  | Intergenic region of 28520 and 28510. Both are hypothetical proteins |
| <i>PA14_01510</i>                         | 1 | 55±5  | N/A   | Putative plasmid stabilization system protein                        |
| <i>PA14_05210</i>                         | 1 | 25±2  | 25±3  | Putative membrane protein                                            |
| <i>PA14_11970</i>                         | 1 | 39±2  | 47±1  | Methylpurine-DNA glycosylase family protein                          |
| <i>PA14_13900</i>                         | 1 | 39±1  | 50±2  | Hypothetical protein                                                 |
| <i>PA14_15290</i>                         | 1 | 31±2  | 49±2  | Putative regulatory protein                                          |

---

|                   |   |       |      |                                      |
|-------------------|---|-------|------|--------------------------------------|
| <i>PA14_39440</i> | 1 | 29±1  | 43±5 | Hypothetical protein                 |
| <i>PA14_41150</i> | 1 | 18±5  | 12±2 | Putative permease of ABC transporter |
| <i>PA14_46510</i> | 1 | 36±3  | 46±3 | Hypothetical protein                 |
| <i>PA14_59180</i> | 1 | 39±6  | N/A  | Topoisomerase I - like protein       |
| <i>PA14_60060</i> | 1 | 45±10 | N/A  | Hypothetical protein                 |
| <i>PA14_72220</i> | 1 | 33±3  | N/A  | Conserved hypothetical protein       |

<sup>a</sup> Sites of transposon insertion are located within the coding sequences of the indicated genes. In bold indicate genes investigated in this study.

<sup>b</sup> Cells were grown in either M8 liquid broth to log phase ( $OD_{600} = 0.5$ ), or on M8 swarming agar (0.5% agar) surface overnight. The Miller units (mean ±SD) from at least three biological replicates were shown.
