# Supplementary material for: A Hierarchical Cascade of Second Messengers Regulates Pseudomonas aeruginosa Surface Behaviors
Source: PubMed Central journal article supplement — mBio. 2015 Jan 27;6(1):e02456-14. doi: 10.1128/mBio.02456-14 (PMC4324313; doi:10.1128/mbio.02456-14), 2015-01-27
Supplement: mbo004142139st2.pdf [file mbo004142139st2.pdf]

**Table S2.** Strains, plasmids and oligonucleotide primers used in this study.

| SMC#/Names                   | Genotype/Description/Sequences*                                         | Reference |
|------------------------------|-------------------------------------------------------------------------|-----------|
| <i>P. aeruginosa</i> strains |                                                                         |           |
| 232                          | <i>P. aeruginosa</i> PA14 (WT strain)                                   | Lab stock |
| 3718                         | $\Delta pilY1$                                                          | (8)       |
| 3782                         | $\Delta pilA$                                                           | (8)       |
| 6640                         | <i>attTn7::P<sub>pilY1</sub>-lacZ Gm<sup>r</sup></i>                    | This work |
| 6610                         | <i>attTn7::P<sub>pilY1</sub>-lacZ</i>                                   | This work |
| 6813                         | $\Delta vfr$ <i>attTn7::P<sub>pilY1</sub>-lacZ Gm<sup>r</sup></i>       | This work |
| 6746                         | $\Delta algR$ <i>attTn7::P<sub>pilY1</sub>-lacZ Gm<sup>r</sup></i>      | This work |
| 6657                         | $\Delta pilGHI$ <i>attTn7::P<sub>pilY1</sub>-lacZ Gm<sup>r</sup></i>    | This work |
| 6658                         | $\Delta pilJ$ <i>attTn7::P<sub>pilY1</sub>-lacZ Gm<sup>r</sup></i>      | This work |
| 6661                         | $\Delta chpB$ <i>attTn7::P<sub>pilY1</sub>-lacZ Gm<sup>r</sup></i>      | This work |
| 6627                         | $\Delta fimT-pilE$ <i>attTn7::P<sub>pilY1</sub>-lacZ Gm<sup>r</sup></i> | This work |
| 6628                         | $\Delta fimT$ <i>attTn7::P<sub>pilY1</sub>-lacZ Gm<sup>r</sup></i>      | This work |
| 6629                         | $\Delta fimU$ <i>attTn7::P<sub>pilY1</sub>-lacZ Gm<sup>r</sup></i>      | This work |
| 6630                         | $\Delta pilV$ <i>attTn7::P<sub>pilY1</sub>-lacZ Gm<sup>r</sup></i>      | This work |
| 6631                         | $\Delta pilW$ <i>attTn7::P<sub>pilY1</sub>-lacZ Gm<sup>r</sup></i>      | This work |
| 6662                         | $\Delta pilX$ <i>attTn7::P<sub>pilY1</sub>-lacZ Gm<sup>r</sup></i>      | This work |
| 6633                         | $\Delta pilY1$ <i>attTn7::P<sub>pilY1</sub>-lacZ Gm<sup>r</sup></i>     | This work |
| 6634                         | $\Delta pilY2$ <i>attTn7::P<sub>pilY1</sub>-lacZ Gm<sup>r</sup></i>     | This work |
| 6635                         | $\Delta pilE$ <i>attTn7::P<sub>pilY1</sub>-lacZ Gm<sup>r</sup></i>      | This work |

---

|      |                                                                        |           |
|------|------------------------------------------------------------------------|-----------|
| 6626 | <i>ΔpilA attTn7::P<sub>pilY1</sub>-lacZ Gm<sup>r</sup></i>             | This work |
| 6653 | <i>ΔpilC::Tn5 attTn7::P<sub>pilY1</sub>-lacZ Gm<sup>r</sup></i>        | This work |
| 6747 | <i>ΔfimV attTn7::P<sub>pilY1</sub>-lacZ Gm<sup>r</sup></i>             | This work |
| 6860 | <i>ΔpilJ Δvfr attTn7::P<sub>pilY1</sub>-lacZ Gm<sup>r</sup></i>        | This work |
| 6822 | <i>ΔchpB ΔpilJ attTn7::P<sub>pilY1</sub>-lacZ Gm<sup>r</sup></i>       | This work |
| 6815 | <i>ΔchpB Δvfr attTn7::P<sub>pilY1</sub>-lacZ Gm<sup>r</sup></i>        | This work |
| 6861 | <i>ΔchpB ΔpilJ Δvfr attTn7::P<sub>pilY1</sub>-lacZ Gm<sup>r</sup></i>  | This work |
| 6823 | <i>ΔpilX ΔpilJ attTn7::P<sub>pilY1</sub>-lacZ Gm<sup>r</sup></i>       | This work |
| 6817 | <i>ΔpilX Δvfr attTn7::P<sub>pilY1</sub>-lacZ Gm<sup>r</sup></i>        | This work |
| 6862 | <i>ΔpilX ΔpilJ Δvfr attTn7::P<sub>pilY1</sub>-lacZ Gm<sup>r</sup></i>  | This work |
| 6824 | <i>ΔpilY1 ΔpilJ attTn7::P<sub>pilY1</sub>-lacZ Gm<sup>r</sup></i>      | This work |
| 6858 | <i>ΔpilY1 Δvfr attTn7::P<sub>pilY1</sub>-lacZ Gm<sup>r</sup></i>       | This work |
| 6863 | <i>ΔpilY1 ΔpilJ Δvfr attTn7::P<sub>pilY1</sub>-lacZ Gm<sup>r</sup></i> | This work |
| 3538 | pR-lacZ                                                                | (20)      |
| 3537 | pR-P1-lacZ                                                             | (20)      |
| 3546 | <i>ΔpilJ</i> pR-lacZ                                                   | Lab stock |
| 3545 | <i>ΔpilJ</i> pR-P1-lacZ                                                | Lab stock |
| 6875 | <i>ΔcyaA</i> pR-lacZ                                                   | This work |
| 6876 | <i>ΔcyaA</i> pR-P1-lacZ                                                | This work |
| 6877 | <i>ΔcyaB</i> pR-lacZ                                                   | This work |
| 6878 | <i>ΔcyaB</i> pR-P1-lacZ                                                | This work |
| 6879 | <i>ΔcyaAB</i> pR-lacZ                                                  | This work |

---

---

|      |                              |             |
|------|------------------------------|-------------|
| 6880 | <i>ΔcyaAB</i> pR-P1-lacZ     | This work   |
| 6881 | <i>ΔcpdA</i> pR-lacZ         | This work   |
| 6882 | <i>ΔcpdA</i> pR-P1-lacZ      | This work   |
| 6833 | <i>ΔpilA</i> pR-lacZ         | This work   |
| 6834 | <i>ΔpilA</i> pR-P1-lacZ      | This work   |
| 6839 | <i>ΔpilU::Tn5</i> pR-lacZ    | This work   |
| 6840 | <i>ΔpilU::Tn5</i> pR-P1-lacZ | This work   |
| 4465 | <i>ΔsadC</i>                 | <u>(21)</u> |
| 2992 | <i>ΔpilJ</i>                 | <u>(22)</u> |
| 2990 | <i>ΔchpB</i>                 | <u>(22)</u> |
| 6706 | <i>ΔcyaA</i>                 | This work   |
| 6869 | <i>ΔcyaB</i>                 | This work   |
| 6870 | <i>ΔcyaA cyaB</i>            | This work   |
| 6851 | <i>ΔcpdA</i>                 | This work   |
| 6873 | <i>Δ cpdA cyaA cyaB</i>      | This work   |
| 3018 | pMQ80                        | (8)         |
| 3733 | pPilY1                       | (8)         |
| 4466 | <i>ΔsadC</i> pMQ80           | (8)         |
| 4467 | <i>ΔsadC</i> pPilY1          | (8)         |
| 4033 | <i>ΔpilJ</i> pMQ80           | This work   |
| 4034 | <i>ΔpilJ</i> pPilY1          | This work   |
| 6864 | <i>ΔchpB</i> pMQ80           | This work   |

---

---

|      |                               |           |
|------|-------------------------------|-----------|
| 6865 | <i>ΔchpB</i> pPilY1           | This work |
| 6853 | <i>ΔcpdA</i> pMQ80            | This work |
| 6854 | <i>ΔcpdA</i> pPilY1           | This work |
| 6855 | <i>ΔcyaB</i> pMQ80            | This work |
| 6856 | <i>ΔcyaB</i> pPilY1           | This work |
| 6883 | <i>ΔcyaA</i> pMQ80            | This work |
| 6884 | <i>ΔcyaA</i> pPilY1           | This work |
| 6887 | <i>ΔcyaA cyaB</i> pMQ80       | This work |
| 6888 | <i>ΔcyaA cyaB</i> pPilY1      | This work |
| 6893 | <i>ΔcyaA cyaB cpdA</i> pMQ80  | This work |
| 6894 | <i>ΔcyaA cyaB cpdA</i> pPilY1 | This work |
| 4021 | <i>ΔpilX</i>                  | (14)      |
| 6765 | <i>ΔpilC</i>                  | This work |
| 6763 | <i>ΔpilO</i>                  | This work |
| 6726 | <i>ΔfimV</i>                  | This work |
| 6724 | <i>ΔpilMNOP</i>               | This work |
| 6723 | <i>ΔpilQ</i>                  | This work |
| 6740 | <i>ΔpilMNOP</i> pMQ80         | This work |
| 6741 | <i>ΔpilMNOP</i> pPilY1        | This work |
| 6744 | <i>ΔfimV</i> pMQ80            | This work |
| 6745 | <i>ΔfimV</i> pPilY1           | This work |

---

---

|                               |                                                                                                                                 |           |
|-------------------------------|---------------------------------------------------------------------------------------------------------------------------------|-----------|
| 6776                          | $\Delta pilC$ pMQ80                                                                                                             | This work |
| 6777                          | $\Delta pilC$ pPilY1                                                                                                            | This work |
| 6738                          | $\Delta pilQ$ pMQ80                                                                                                             | This work |
| 6739                          | $\Delta pilQ$ pPilY1                                                                                                            | This work |
| 6800                          | $\Delta pilQ \Delta xcpQ \Delta hxcQ$                                                                                           | This work |
| 6805                          | $\Delta pilQ \Delta xcpQ \Delta hxcQ$ pMQ80                                                                                     | This work |
| 6806                          | $\Delta pilQ \Delta xcpQ \Delta hxcQ$ pPilY1                                                                                    | This work |
| <b><i>E. coli</i> strains</b> |                                                                                                                                 |           |
| S17-1 $\lambda$ <i>pir</i>    | <i>thi pro hsdR hsdM<sup>+</sup> <math>\Delta</math>recA RP4-2::TcMu-Km::Tn7</i>                                                |           |
| BTH101                        | <i>F<sup>-</sup>, cya<sup>-99</sup>, araD139, galE15, galK16, rpsL1 (Str<sup>r</sup>),<br/>hsdR2, mcrA1, mcrB1</i>              | Euromedex |
| <b>Plasmids</b>               |                                                                                                                                 |           |
| pBT20                         | Vector carrying <i>mariner</i> transposon, Gm <sup>r</sup>                                                                      | (23)      |
| pUC18-mini-                   | Suicide vector for shuttling single copies of genes                                                                             | (2)       |
| Tn7T-Gm-lacZ                  | directly to the chromosome via a mini-Tn7 element;<br>contain promoterless- <i>lacZ</i> transcriptional fusion; Gm <sup>r</sup> |           |
| pUC18-mini-                   | <i>pilY1</i> operon promoter cloned into pUC18-mini-Tn7T-                                                                       | This work |
| Tn7T-Gm-                      | Gm-lacZ, Gm <sup>r</sup>                                                                                                        |           |
| P <sub>pilY1</sub> -lacZ      |                                                                                                                                 |           |
| pTns3                         | Helper plasmid encoding the Tn7 site-specific<br>transposition pathway, Amp <sup>r</sup>                                        | (24)      |
| pMQ30                         | Shutter vector for cloning in yeast and Gram-negative                                                                           | (1)       |

---

---

|                          |                                                                                                   |            |
|--------------------------|---------------------------------------------------------------------------------------------------|------------|
|                          | allelic replacement. Gm <sup>r</sup>                                                              |            |
| pMQ80                    | Shutter vector for cloning in yeast and for arabinose-induced gene expression. Gm <sup>r</sup>    | (1)        |
| pPilY1                   | His-tagged <i>pilY1</i> cloned into pMQ80. Gm <sup>r</sup>                                        | (8)        |
| pKNT25                   | BACTH vector allowing fusions to N-terminal of the T25 fragment of <i>cyaA</i> , Kan <sup>r</sup> | Euromedex  |
| pUT18                    | BACTH vector allowing fusions to N-terminal of the T18 fragment of <i>cyaA</i> , Amp <sup>r</sup> | Euromedex  |
| pKT25-zip                | Leucine zipper of GCN4 fused to T25 in pKT25, Kan <sup>r</sup>                                    | Euromedex  |
| pUT18C-zip               | Leucine zipper of GCN4 fused to T18 in pUT18C, Amp <sup>r</sup>                                   | Euromedex  |
| pKNT25- <i>fimS</i>      | Full length of <i>fimS</i> cloned into pKNT25. Kan <sup>r</sup>                                   | This work  |
| pUT18- <i>fimS</i>       | Full length of <i>fimS</i> cloned into pUT18, Amp <sup>r</sup>                                    | This work  |
| pKNT25- <i>pilJ</i>      | Full length of <i>pilJ</i> cloned into pKNT25. Kan <sup>r</sup>                                   | This work  |
| pUT18- <i>pilJ</i>       | Full length of <i>pilJ</i> cloned into pUT18. Amp <sup>r</sup>                                    | This work  |
| <b>Oligo Nucleotides</b> |                                                                                                   | <b>YP#</b> |
| PpilY1-F                 | GCCGCTGCAGAGTGGCAATTGGTGCTCAAT<br>C                                                               |            |
| PpilY1-R                 | GCGGGGTACCGCAGTACTCCACAAGGAAA<br>AG                                                               |            |
| Vfr-KO-1                 | tgtaaacgacggccagtccaagcttgcctgCCTCTTCG<br>CGATGGCGATTGT                                           | YP9        |
| Vfr-KO-2                 | TCAGCACGCGTCCGACCATTCTGCGAGCA                                                                     | YP10       |

---

---

|                 |                                              |       |
|-----------------|----------------------------------------------|-------|
|                 | GCTTGTCTAGGTGT                               |       |
| Vfr-KO-3        | ACACCTAGACAAGCTGCTCGCAGAAATGGT               | YP11  |
|                 | CGGACGCGTGCTGA                               |       |
| vfr-KO-4        | ggaaacagctatgaccatgattacgaattcgagctcTGTGCCGA | YP12  |
|                 | CGGTTCTGCAGA                                 |       |
| vfr-KO-check-1  | TGCCCGTCAGATGCGAACGA                         | YP14  |
| vfr-KO-check-2  | CGCCGTTTACAGAGAGGAGA                         | YP15  |
| algR-KO-1       | tgtaaacgacggccagtccaagcttgcctgGCCGTCCA       | YP16  |
|                 | AGACGACTTCTTCA                               |       |
| algR-KO-2       | GTCGAGGCCTTTCAGGTAGAGCGCCAGAGG               | YP17  |
|                 | TTCGTCATCGAC                                 |       |
| algR-KO-3       | GTCGATGACGAACCTCTGGCGCTCTACCTG               | YP18  |
|                 | AAAGGCCTCGAC                                 |       |
| algR-KO-4       | ccatgattacgaattcgagctcggtagccgggatccGCCGTTG  | YP19  |
|                 | AGTCGCTTGTTCA                                |       |
| algR-KO-check-1 | CGGGCAAAGTGCGACGATGA                         | YP20  |
| algR-KO-check-2 | GCAGCAACTGGGTGCCATCA                         | YP21  |
| cyaB-KO-1       | tgtaaacgacggccagtccaagcttgcctgCGATGATC       | YP170 |
|                 | CGCTGGTAGCGT                                 |       |
| cyaB-KO-2       | CTGGATGACCCGTTCCCTTGTCGTAGTATTCA             | YP171 |
|                 | CGCATGGACGCGAC                               |       |
| cyaB-KO-3       | GTCGCGTCCATGCGTGAATACTACGACAAG               | YP172 |
|                 | GAACGGGTCATCCAG                              |       |

---

---

|                 |                                              |       |
|-----------------|----------------------------------------------|-------|
| cyaB-KO-4       | ggaaacagctatgaccatgattacgaattcgagctcGAATACCT | YP173 |
|                 | GCGTGACCGCTGTC                               |       |
| cyaB-KO-check-1 | GCGATCACCATGCACCGTGA                         | YP174 |
| cyaB-KO-check-2 | GACGGCAGCATCCAGCTCTA                         | YP175 |
| cpdA-KO-1       | tgtaaaacgacggccagtccaagcttgcctgCGATTGCG      | YP164 |
|                 | TGGTGCTCATCGA                                |       |
| cpdA-KO-2       | GTATCCGGCGGTGTCGTAGTCAGTGTTCGA               | YP165 |
|                 | ATGGCGTGACAAG                                |       |
| cpdA-KO-3       | CTTGTCACGCCATTTCGAACACTGACTACGA              | YP166 |
|                 | CACCGCCGGATAC                                |       |
| cpdA-KO-4       | ggaaacagctatgaccatgattacgaattcgagctcCGTCGATG | YP167 |
|                 | ACTTCCAGCGAGT                                |       |
| cpdA-KO-check-1 | CGCGGCTTCTATCGTCTCGAT                        | YP168 |
| cpdA-KO-check-2 | GGCATGCAGCTTGGTAAGGAT                        | YP169 |
| pilC-KO-1       | tgtaaaacgacggccagtccaagcttgcctgGACTCCTC      | YP97  |
|                 | TAGCGCGCAGAT                                 |       |
| pilC-KO-2       | TGATCATCGGCTCCATCAACGTGCGGACCT               | YP98  |
|                 | TTAGTGGGTTGA                                 |       |
| pilC-KO-3       | TCAACCCACTAAAGGTCCGCACGTTGATGG               | YP99  |
|                 | AGCCGATGATCA                                 |       |
| pilC-KO-4       | ggaaacagctatgaccatgattacgaattcgagctcGTGGACGC | YP100 |
|                 | CGAGGGAAATGA                                 |       |
| pilC-KO-check-1 | TGTCGAAGACCAAGTCCATCGA                       | YP101 |

---



---

|                 |                                                              |       |
|-----------------|--------------------------------------------------------------|-------|
| pilC-KO-check-2 | GCGTTCGACGATCTTCGCCA                                         | YP102 |
| pilO-KO-1       | tgtaaacgacggccagtccaagcttgcctgCAGCTCAC<br>CGAGGAGATCCA       | YP85  |
| pilO-KO-2       | TGTCGTTGTAGCGGTAGGTCTTTACGTCGAT<br>CTTGCGCAGACT              | YP86  |
| pilO-KO-3       | AGTCTGCGCAAGATCGACGTAAAGACCTAC<br>CGCTACAACGACA              | YP87  |
| pilO-KO-4       | ggaaacagctatgaccatgattacgaattcgagctcATTGCCGA<br>CCACCACGAAGA | YP88  |
| pilO-KO-check-1 | ATGACCACCCTGAGCGTCCT                                         | YP89  |
| pilO-KO-check-2 | TTGATCGGCTGGGCATAGCT                                         | YP90  |
| pilM-KO-1       | tgtaaacgacggccagtccaagcttgcctgGGTAGCG<br>TTGCTGGTCGATGA      | YP36  |
| PilMNOP-KO-2    | TGATGCCGACGACCTTGCCCTCAAGGAGCT<br>TTACCGAGGTCGA              | YP37  |
| pilMNOP-KO-3    | TCGACCTCGGTAAAGCTCCTTGAGGGCAAG<br>GTCGTCGGCATCA              | YP38  |
| pilP-KO-4       | ggaaacagctatgaccatgattacgaattcgagctcCAGCTGCA<br>GTACCGAACGCA | YP39  |
| pilM-KO-check-1 | GGCGCTGGTCATAGTCGATGA                                        | YP40  |
| pilP-KO-check-2 | GCCCTTGGTCTTCAGCACCA                                         | YP41  |
| pilQ-KO-1       | tgtaaacgacggccagtccaagcttgcctgGCCCAGC<br>GACACCGAGGTA        | YP30  |

---

---

|                 |                                              |       |
|-----------------|----------------------------------------------|-------|
| pilQ-KO-2       | TCATGATCCGCGGTGTCAGGAACTCGTCGA               | YP31  |
|                 | ACTGCAGCTTTAGCT                              |       |
| pilQ-KO-3       | AGCTAAAGCTGCAGTTCGACGAGTTCCTGA               | YP32  |
|                 | CACCGCGGATCATGA                              |       |
| pilQ-KO-4       | ggaaacagctatgaccatgattacgaattcgagctcGAGGAGTC | YP33  |
|                 | GACCTGGGACAACA                               |       |
| pilQ-KO-check-1 | CTGGAAGCCTACAAGGCACAGA                       | YP34  |
| pilQ-KO-check-2 | GCTGGTAGAACGCACCGATCA                        | YP35  |
| fimV-KO-1       | tgtaaacgacggccagtgccaagcttgcattgctgCGGCGAT   | YP22  |
|                 | GTCGATAGCTTCGA                               |       |
| fimV-KO-2       | TCGTTACCTTCGGCCAGGACTTCGATTGCCC              | YP23  |
|                 | GAACCAGTGTACGA                               |       |
| fimV-KO-3       | TCGTACACTGGTTCGGGCAATCGAAGTCCT               | YP24  |
|                 | GGCCGAAGGTAACGA                              |       |
| fimV-KO-4       | ccatgattacgaattcgagctcggtagccgggatccCCTCGAC  | YP25  |
|                 | GAGTGAGCGACGA                                |       |
| fimV-KO-check-1 | CTGGTCGGTCTCCTCGACGA                         | YP26  |
| fimV-KO-check-2 | CRACTCGGGTGATACCGCAGA                        | YP27  |
| xcpQ-KO-1       | tgtaaacgacggccagtgccaagcttgcattgctg          | YP103 |
|                 | TGGCGAAGCTGAACGGCAGA                         |       |
| xcpQ-KO-2       | TGTCCATCGAACAACTGGTTGGCGGCGGGA               | YP104 |
|                 | ACGTACGAACGAC                                |       |
| xcpQ-KO-3       | GTCGTTTCGTACGTTCCCGCCGCCAACCAGTT             | YP105 |

---

---

|                 |                                              |       |
|-----------------|----------------------------------------------|-------|
|                 | GTTCGATGGACA                                 |       |
| xcpQ-KO-4       | ggaaacagctatgaccatgattacgaattcgagctc         | YP106 |
|                 | TGGAAGACCTCGACGACCTCA                        |       |
| xcpQ-KO-check-1 | GCCTGGTTGAAGGCGTCCT                          | YP107 |
| xcpQ-KO-check-2 | GGTCTCGATCACCAACCAACCT                       | YP108 |
| hxcQ-KO-1       | tgtaaacgacggccagtccaagcttgcctgGAGCGAC        | YP109 |
|                 | GCGACGCCTATCT                                |       |
| hxcQ-KO-2       | ATGTCGCCGACGCTCCAGTCGACCTTCGGC               | YP110 |
|                 | GTCTCGCTACA                                  |       |
| hxcQ-KO-3       | TGTAGCGAGACGCCGAAGGTCGACTGGAGC               | YP111 |
|                 | GTCGGCGACAT                                  |       |
| hxcQ-KO-4       | ggaaacagctatgaccatgattacgaattcgagctcGGTCCTCG | YP112 |
|                 | ACGGTGAGGATGT                                |       |
| hxcQ-KO-check-1 | TTGCAACGGCAGAGCAGTCA                         | YP113 |
| hxcQ-KO-check-2 | GGCTACGGCGAAGGTCATGT                         | YP114 |

---

\* For primer sequences, lower case letters indicate sequences that are complementary to the cloning vector pMQ30, and boldface indicates restriction sites.
